# Supplementary material for: Dispersion-enhancing surface treatment of AuNPs for a reduced probe loading and detection limit using t-SPR detection
Source: Royal Society of Chemistry journal article supplement (doi:10.1039/d1an00973g), 2021-01-01
Supplement: d1an00973g1.pdf [file d1an00973g1.pdf]

Manuscript title: Dispersion-Enhancing surface treatment of AuNP for Reduced Probe loading and detection limit using t-SPR detection.

Supplementary information:

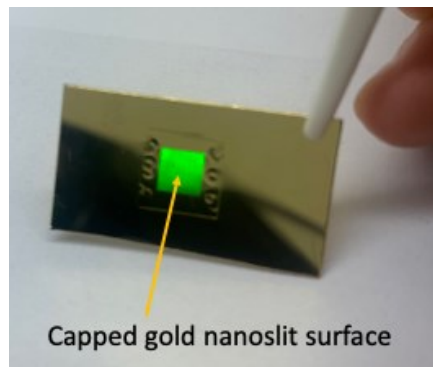

Figure S1 A representative photo of the capped gold nanoslit chip. The nanoslit region is in green color owing to the diffracted light by the periodic nanostructure.

Table S1: Sequences of the probes and targets used in this study. Segment pairs marked with the same colors are the complimentary moieties.

|                                       | Sequence                                                                           |
|---------------------------------------|------------------------------------------------------------------------------------|
| Mimicking COVID-19 target sequence    | 5'-GACCCCAAATCAGCGAAATGCACCCCGCATTACGTT-TGGTGGACCCTCAGATTCAACTGGCAGTAACCAGA-3'     |
| COVID-19 Monitoring probe             | 5'-C6SH- TTTTT TTTTT TTCTG GTTAC TGCCA GTTGA A-3'                                  |
| COVID-19 Capturing probe              | 5'-ATTTC GCTGA TTTTG GGGTC TTTTT TTTTT T- C3SH-3'                                  |
| Mimicking Influenza A target sequence | 5'-GACCAATCCTGTACCTCTGACTAAGGGAATTTAGGA-TTTGTGTTACGCTCACCGTGCCAGTGAGCGAGGACTGCA-3' |
| Influenza A Monitoring probe          | 5'-C6SH- TTTTT TTTTT TTGCA GTCCT CGCTC ACTGG G-3'                                  |
| Influenza A Capturing probe           | 5'-CAGAG GTGAC AGGAT TGGTC TTTTT TTTTT T- C3SH-3'                                  |

Table S2: The diameters (nm) of AuNPs coated with various concentration of thiol-PEG and unmodified PEG measured using DLS

| Total concentration | Thiol-modified PEG <sub>2000</sub> | Unmodified PEG <sub>2000</sub> |
|---------------------|------------------------------------|--------------------------------|
| 0                   | 57.9                               |                                |
| 25                  | 71.6                               | 69.2                           |
| 51                  | 58.5                               | 68.9                           |

|     |       |      |
|-----|-------|------|
| 75  | 69.17 | 65.6 |
| 105 | 390.4 | 75.7 |
| 150 | 66.6  | 66.1 |
